# Supplementary material for: Fingerprinting of Volatile Organic Compounds for the Geographical Discrimination of Rice Samples from Northeast China
Source: MDPI journal article supplement (doi:10.3390/foods11121695), 2022-06-09
Supplement: s1 [file s1]

## **SUPPLEMENTARY INFORMATION**

(Table S1- Table S2; Figure S1-Figure S2)

### **Metabolomic fingerprinting of volatile organic compounds for the geographical discrimination of rice samples from Northeast China**

Sailimuhan Asimi<sup>12#</sup>, Ren Xin<sup>12#</sup>, Zhang Min<sup>12\*</sup>, Li Sixuan<sup>12</sup>, Guan Lina<sup>12</sup>,  
Wang Zhenhua<sup>12</sup>, Shan Liang<sup>12</sup>, Wang Ziyuan<sup>12</sup>

1. Beijing Advanced Innovation Center for Food Nutrition and Human Health, Beijing Technology and Business University, Beijing 100048, China;
2. Beijing Engineering and Technology Research Center of Food Additives, Beijing Technology and Business University, Beijing 100048, China

Address: Beijing Technology & Business University, 11 Fucheng Road, Beijing, China, 100048.

Tel : 86-10- 68984547

<sup>#</sup>These authors contributed equally to this work and should be considered co-first authors

#### **Correspondence:**

Zhang Min (zmin@th.btbu.edu.cn)

Table S1 Geographical origin of the rice samples

| Samples | Variety      | Region       | Prefecture |
|---------|--------------|--------------|------------|
| 1       | Longjing 31  | Heilongjiang | Qiqihar    |
| 2       | Longjing 39  | Heilongjiang | Qiqihar    |
| 3       | Longjing 46  | Heilongjiang | Qiqihar    |
| 4       | Longjing 71  | Heilongjiang | Qiqihar    |
| 5       | Suijing 306  | Heilongjiang | Suihua     |
| 6       | Longke 3     | Heilongjiang | Qiqihar    |
| 7       | Jinyu 1      | Heilongjiang | Qiqihar    |
| 8       | Suijing 18   | Heilongjiang | Suihua     |
| 9       | Suijing 28   | Heilongjiang | Suihua     |
| 10      | Suijing 302  | Heilongjiang | Suihua     |
| 11      | Jijing303    | Jilin        | Changchun  |
| 12      | Jijing525    | Jilin        | Changchun  |
| 13      | Jijing816    | Jilin        | Changchun  |
| 14      | Jijing 830   | Jilin        | Tonghua    |
| 15      | Jiyang 1     | Jilin        | Tonghua    |
| 6       | Jiyang 100   | Jilin        | Tonghua    |
| 17      | Tonghe 877   | Jilin        | Tonghua    |
| 18      | Tonghe 822   | Jilin        | Tonghua    |
| 19      | Tongyuan 568 | Jilin        | Tonghua    |
| 20      | Tongke 29    | Jilin        | Tonghua    |
| 21      | Liaojing 212 | Liaoning     | Shenyang   |
| 22      | Liaojing 436 | Liaoning     | Shenyang   |
| 23      | Liaojing 433 | Liaoning     | Shenyang   |
| 24      | Liaojing 419 | Liaoning     | Shenyang   |
| 25      | Liaoxing 21  | Liaoning     | Shenyang   |
| 26      | Yanjing 927  | Liaoning     | Panjin     |
| 27      | Yanjing 337  | Liaoning     | Panjin     |
| 28      | Yanfeng 47   | Liaoning     | Panjin     |
| 29      | Yanjing 939  | Liaoning     | Panjin     |
| 30      | Yanjing 219  | Liaoning     | Panjin     |

Table S2 VOCs identified in the rice sample with GC–MS. (µg/kg)

| No | Compound                                | CAS        | Molecular Formula                              | RI   | Heilongjiang | Jilin        | Liaoning      |
|----|-----------------------------------------|------------|------------------------------------------------|------|--------------|--------------|---------------|
| 1  | Decane                                  | 124-18-5   | C <sub>10</sub> H <sub>22</sub>                | 1000 | 0.58–3.24    | 0.35–5.42    | 0.28–0.62     |
| 2  | Undecane                                | 1120-21-4  | C <sub>11</sub> H <sub>24</sub>                | 1100 | 1.78–6.59    | 0.71–12.97   | 2.29–3.43     |
| 3  | 2-methyl-decane                         | 6975-98-0  | C <sub>11</sub> H <sub>24</sub>                | 1064 | 0.46–7.14    | 2.1–32.98    | 15.02–15.21   |
| 4  | Dodecane                                | 112-40-3   | C <sub>12</sub> H <sub>26</sub>                | 1200 | 8.87–22.41   | 4.72–28.37   | 17.45–59.48   |
| 5  | Tridecane                               | 629-50-5   | C <sub>13</sub> H <sub>28</sub>                | 1300 | 3.15–27.48   | 2.98–26.78   | 56.34–64.59   |
| 6  | Tetradecane                             | 629-59-4   | C <sub>14</sub> H <sub>30</sub>                | 1400 | 28.91–119.44 | 49.2–115.99  | 153.71–246.26 |
| 7  | Hexadecane                              | 544-76-3   | C <sub>16</sub> H <sub>34</sub>                | 1600 | 2.44–9.72    | 2.28–19.27   | 12.26–16.56   |
| 8  | 2,6,10,14-tetramethyl-hexadecane        | 638-36-8   | C <sub>20</sub> H <sub>42</sub>                | 1792 | 2.69–7.93    | 4.85–14.85   | 8.06–15.51    |
| 9  | Styrene                                 | 100-42-5   | C <sub>8</sub> H <sub>8</sub>                  | 1254 | 3.27–13.22   | 2.13–15.29   | 23.17–45.29   |
| 10 | 2,6-dimethyl-decane                     | 13150-81-7 | C <sub>12</sub> H <sub>26</sub>                | 1112 | 1.15–7.54    | 2.49–10.35   | 6.43–23.0     |
| 11 | 2-methyl-dodecane                       | 1560-97-0  | C <sub>13</sub> H <sub>28</sub>                | 1264 | 6.89–129.06  | 9.33–33.9    | 158.78–204.51 |
| 12 | 2,6,10-trimethyl-dodecane               | 3891-98-3  | C <sub>15</sub> H <sub>32</sub>                | 1366 | 8.72–138.3   | 8.13–43.86   | 54.8–286.06   |
| 13 | Heptanal                                | 111-71-7   | C <sub>7</sub> H <sub>14</sub> O               | 1182 | 8.70–8.70    | 4.70–9.75    | n.d.          |
| 14 | (E,E)-2,4-nonadienal                    | 5910-87-2  | C <sub>9</sub> H <sub>14</sub> O               | 1216 | 9.71–71.91   | 0.58–12.93   | 28.31–61.67   |
| 15 | Nonanal                                 | 124-19-6   | C <sub>9</sub> H <sub>18</sub> O               | 1104 | 8.29–17.85   | 2.51–44.89   | n.d.          |
| 16 | (E)-2-heptenal                          | 18829-55-5 | C <sub>7</sub> H <sub>12</sub> O               | 1334 | 5.03–5.03    | 81.48–277.59 | 289.36–374.42 |
| 17 | Decanal                                 | 112-31-2   | C <sub>10</sub> H <sub>20</sub> O              | 1206 | 1.18–18.40   | 7.69–12.53   | 8.94–47.46    |
| 18 | Pentadecanal                            | 316249     | C <sub>15</sub> H <sub>30</sub> O              | 1715 | 1.59–6.82    | 0.46–18.36   | 2.36–2.88     |
| 19 | Hexadecanal                             | 629-80-1   | C <sub>16</sub> H <sub>32</sub> O              | 1817 | 0.52–2.10    | 1.44–2.84    | 0.81–0.88     |
| 20 | (E) 6, 10-dimethyl-5,9 undecadien-2-one | 3796-70-1  | C <sub>13</sub> H <sub>22</sub> O              | 1876 | 4.79–15.45   | 12.62–29.42  | 11.50–19.01   |
| 21 | 6,10-dimethyl-2-undecanone              | 1604-34-8  | C <sub>13</sub> H <sub>26</sub> O              | 1408 | 13.76–25.85  | 6.99–20.19   | 12.11–19.78   |
| 22 | Hexanol                                 | 626-93-7   | C <sub>6</sub> H <sub>14</sub> O               | 1211 | 3.90–24.12   | 1.71–27.2    | 19.03–51.06   |
| 23 | 1-octanol                               | 111-87-5   | C <sub>8</sub> H <sub>18</sub> O               | 1558 | 0.42–4.66    | 1.28–8.39    | 6.22–24.36    |
| 24 | n-heptadecanol                          | 1454-85-9  | C <sub>17</sub> H <sub>36</sub> O              | 1984 | 0.27–0.85    | 1.26–3.46    | 1.49–1.69     |
| 25 | 2-hexyl-1-decanol                       | 2425-77-6  | C <sub>16</sub> H <sub>34</sub> O              | 1504 | 8.10–32.28   | 12.09–24.13  | 21.35–37.47   |
| 26 | 3,7,11-trimethyl-1-dodecanol            | 6750-34-1  | C <sub>15</sub> H <sub>32</sub> O              | 1571 | 1.88–5.75    | 1.13–7.99    | 12.54–49.56   |
| 27 | Octanoic acid                           | 124-07-2   | C <sub>8</sub> H <sub>16</sub> O <sub>2</sub>  | 2050 | 0.14–0.40    | 0.27–5.78    | 0.26–0.31     |
| 28 | n-Hexadecanoic acid                     | 57-10-3    | C <sub>16</sub> H <sub>32</sub> O <sub>2</sub> | 1968 | 1.05–2.03    | 2.02–8.28    | 1.58–2.38     |
| 29 | Hexanoic acid                           | 142-62-1   | C <sub>6</sub> H <sub>12</sub> O <sub>2</sub>  | 1849 | 0.09–0.09    | n.d.         | 0.42–0.42     |
| 30 | Nonanoic acid                           | 112-05-0   | C <sub>9</sub> H <sub>18</sub> O <sub>2</sub>  | 2173 | 0.48–1.52    | 0.85–2.92    | 0.95–8.01     |
| 31 | Benzyl alcohol                          | 100-51-6   | C <sub>7</sub> H <sub>8</sub> O                | 1877 | 1.89–6.22    | 3.61–5.57    | 3.85–5.21     |
| 32 | Toluene                                 | 108-88-3   | C <sub>7</sub> H <sub>8</sub>                  | 1036 | 0.88–11.29   | 0.61–3.05    | 1.17–1.96     |
| 33 | 2-butyl-1-octanol                       | 735273     | C <sub>12</sub> H <sub>26</sub> O              | 1277 | 11.95–80.42  | 6.69–41.94   | 55.07–79.89   |

RI: retention index.

n.d.: not detected.

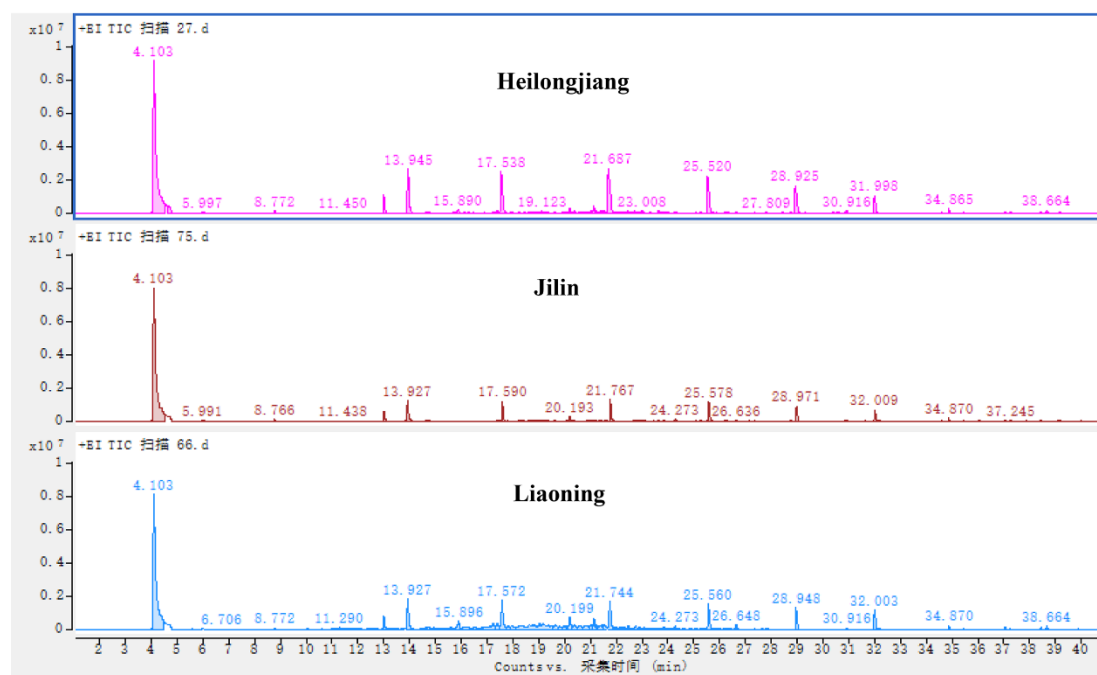

**Figure S1.** Total ion chromatogram of VOCs profile of Heilongjiang, Liaoning, and Jilin rice samples were obtained from HS-SPME-GC-MS.

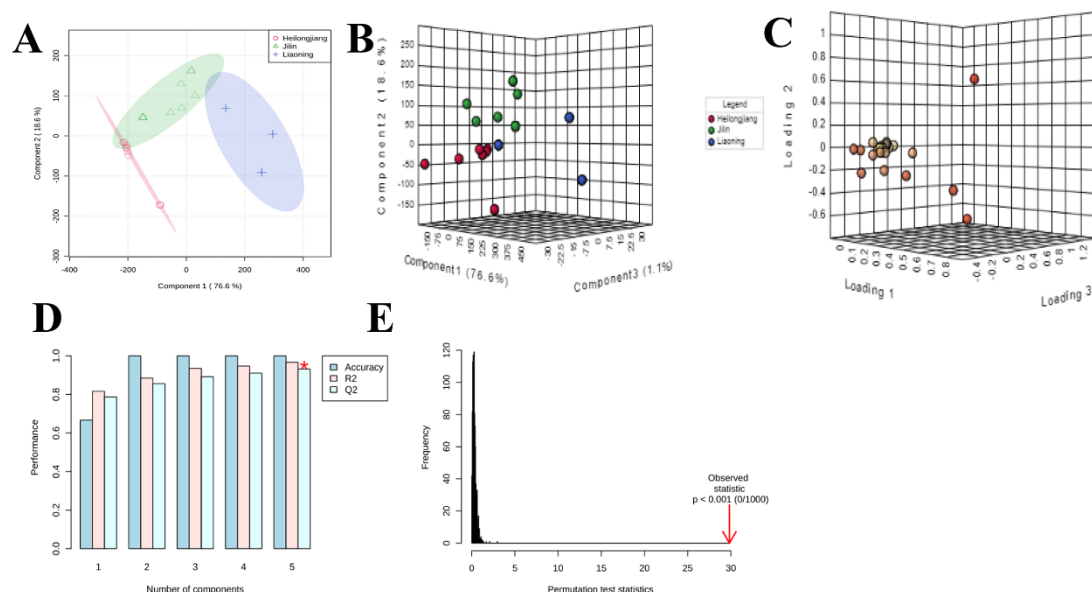

**Figure S2.** Significant differences in VOCs profile of Heilongjiang, Jilin, and Liaoning rice samples A) PLS-DA scores plot for the first component (76.6%) Vs second component (18.6%), indicating discrimination between Heilongjiang (red color), Jilin (green color), and Liaoning (blue color) rice samples. B) Three-dimensional PLS-DA scores plot. C) Three-dimensional PLS-DA loading plot. D) PLS-DA classification using the different number of components. Bar plots show the three performance measures (prediction accuracy, R2, and Q2) using different components. The red '\*' indicates the best values of the currently selected measures (Q<sup>2</sup>). E) PLS-DA model validation by permutation tests based on the separation distance. The p-value based on permutation is  $P < 0.001$  (0/1000).
